# Supplementary material for: Spatio-Temporal Distribution and Influencing Factors of Human and Veterinary Pharmaceuticals in the Tributary Surface Waters of the Han River Watershed, South Korea
Source: MDPI journal article supplement (doi:10.3390/ijerph18157969), 2021-07-28
Supplement: s1 [file s1]

## Supplementary Materials

### Table and Figure of Contents

**Table S1.** Physicochemical properties of the target pharmaceuticals.

**Table S2.** Information regarding WWTPs investigated in this study

**Table S3.** Analytical MS/MS conditions and retention time of the target pharmaceuticals.

**Table S4.** Summary results for mean concentration and frequency detection of pharmaceuticals at each sites of Han River watershed.

**Table S1.** Physicochemical properties of target pharmaceuticals.

| Compounds            | Structure                                                                           | Water solubility<br>(mg/L) | pK <sub>a</sub> | LogK <sub>ow</sub> | LogK <sub>oc</sub> | LogD <sub>ow</sub> | Half-life surface water<br>(hour) | Henry's law constant<br>(atm m <sup>3</sup> /mol) |
|----------------------|-------------------------------------------------------------------------------------|----------------------------|-----------------|--------------------|--------------------|--------------------|-----------------------------------|---------------------------------------------------|
| Naproxen             | 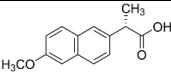   | 4.41×10 <sup>1</sup>       | 4.39            | 3.18               | 2.525              | 0.33               | 360                               | 3.39×10 <sup>-10</sup>                            |
| Acetylsalicylic acid |    | 4.6×10 <sup>3</sup>        | 3.5             | 1.19               | 2.0                | -2.31              | 151.2                             | 1.30×10 <sup>-9</sup>                             |
| Carbamazepine        |    | 1.77×10 <sup>1</sup>       | 13.9            | 2.45               | 3.59               | 2.45               | 900                               | 1.08×10 <sup>-10</sup>                            |
| Trimethoprim         |    | 2.33×10 <sup>3</sup>       | 7.12            | 0.91               | 2.857              | 1.13               | 1440                              | 2.39×10 <sup>-14</sup>                            |
| Clarithromycin       |    | 3.42×10 <sup>-1</sup>      | 8.99            | 3.16               | 2.174              | 2.31               | -                                 | 1.73×10 <sup>-29</sup>                            |
| Sulfamethazine       |    | 1.12×10 <sup>4</sup>       | 7.6/2.3         | 0.89               | 2.282              | 0.66               | 900                               | 3.05×10 <sup>-13</sup>                            |
| Sulfamethoxazole     |    | 3.94×10 <sup>3</sup>       | 5.7/1.8         | 0.89               | 2.412              | -0.43              | 900                               | 9.56×10 <sup>-13</sup>                            |
| Sulfathiazole        |  | 3.73×10 <sup>2</sup>       | 2.0/7.1         | 0.047              | 2.3                | -0.22              | -                                 | 5.80×10 <sup>-14</sup>                            |

Water solubility, octanol-water partition coefficient (Log K<sub>ow</sub>), soil organic carbon-water partition coefficient (Log K<sub>oc</sub>), pK<sub>a</sub> and distribution coefficients (Log D<sub>ow</sub> at pH =7) for ionizable compounds and surface water half-life were compiled using EPI Suite.

**Table S2.** WWTPs information investigated in this study

| WWTP (name)           | Area | Capacity (m <sup>3</sup> d <sup>-1</sup> ) <sup>a</sup> |           | Treatment technologies |
|-----------------------|------|---------------------------------------------------------|-----------|------------------------|
|                       |      | Design                                                  | Operation |                        |
| WWTP-1 (Wonju)        | SHR  | 156,000                                                 | 120,595   | NPR                    |
| WWTP-2 (Moonmak)      | SHR  | 7,000                                                   | 4,811     | BNR                    |
| WWTP-3 (Gwangju)      | SHR  | 25,000                                                  | 24,572    | HBR, SBAF              |
| WWTP-4 (Gonjiam)      | SHR  | 23,000                                                  | 21,694    | SBF                    |
| WWTP-5 (Yangbeol)     | SHR  | 20,000                                                  | 7,216     | SBAF                   |
| WWTP-6 (Samri)        | SHR  | 5,000                                                   | 4,211     | SBAF                   |
| WWTP-7 (Icheon)       | SHR  | 43,000                                                  | 40,277    | DeNiPho                |
| WWTP-8 (Danweol)      | SHR  | 2,000                                                   | 1,863     | MSBR                   |
| WWTP-9 (Yongmoon)     | SHR  | 4,900                                                   | 3,388     | MBR                    |
| WWTP-10 (Danweol)     | SHR  | 1,700                                                   | 1,432     | KNR                    |
| WWTP-11 (Injebukmeon) | NHR  | 2,000                                                   | 1,482     | SBR                    |
| WWTP-12 (Cheongsan)   | IHR  | 2,100                                                   | 1,125     | MSBR                   |
| WWTP-13 (Dongducheon) | IHR  | 86,000                                                  | 74,327    | CNR                    |
| WWTP-14 (Guri)        | HR   | 160,000                                                 | 150,169   | MLE                    |
| WWTP-15 (Jingeon)     | HR   | 100,000                                                 | 107,981   | CSBR                   |
| WWTP-16 (Tancheon)    | HR   | 900,000                                                 | 733,833   | MLE                    |
| WWTP-17 (Gwacheon)    | HR   | 30,000                                                  | 20,577    | DeNiPho                |
| WWTP-18 (Seongnam)    | HR   | 460,000                                                 | 346,611   | CAS                    |
| WWTP-19 (Jongrang)    | HR   | 1,590,000                                               | 1,234,376 | CAS, MLE, SBAF         |
| WWTP-20 (Parkdal)     | HR   | 250,000                                                 | 126,348   | CSBR                   |
| WWTP-21 (Suksu)       | HR   | 300,000                                                 | 226,695   | MLE                    |
| WWTP-22 (Gulpo)       | HR   | 900,000                                                 | 672,461   | DeNiPho                |
| WWTP-23 (Geumchon)    | HR   | 44,000                                                  | 28,853    | MBR, HDF               |
| WWTP-24 (Samsong)     | HR   | 16,000                                                  | 7,153     | CSBR                   |

<sup>a</sup>average daily value (2015), NPR: nitrogen and phosphorus removal process, BNR: biological nutrient removal process, SBAF: SK biological aerated filters, SBF: suspended bio filter, HBR: suspended bio filter, MSBR: modified sequencing batch reactor, DeNiPho: activated sludge treatment with biological removal of nitrogen and phosphorous, KNR: Kwon's nutrient removal, MBR: membrane bio reactor, SBR: sequencing batch reactor, CNR: cilium nutrient removal process, MLE: modified Ludzack-Ettinger process, CSBR: constants sequencing batch process, CAS: conventional activated sludge process, HDF: Hanhwa dynamic flow

**Source:** South Korea Ministry of Environment, 2016-17 Sewerage statistics and 2016-17 Operation status of wastewater treatment plants.

**Table S3.** Analytical MS/MS conditions and retention time of the target pharmaceuticals.

| Compounds | R.T. | Precursor<br>(m/z) | Quantitation<br>ion (m/z) | Cone<br>energy<br>(V) | Collision<br>energy (V) | Ionization<br>mode |
|-----------|------|--------------------|---------------------------|-----------------------|-------------------------|--------------------|
| ASA       | 4.07 | 137.1              | 46.1                      | 10                    | 9                       | ESI(-)             |
| NPX       | 7.52 | 229.1              | 170                       | 18                    | 15                      | ESI(-)             |
| CBZ       | 6.02 | 237.2              | 194.2                     | 36                    | 18                      | ESI(+)             |
| CTM       | 5.9  | 748.3              | 158.1                     | 38                    | 28                      | ESI(+)             |
| TMP       | 2.5  | 291.1              | 230.2                     | 40                    | 22                      | ESI(+)             |
| SMX       | 4.33 | 253.9              | 156                       | 28                    | 17                      | ESI(+)             |
| SMZ       | 3.39 | 279.1              | 186                       | 32                    | 17                      | ESI(+)             |
| STZ       | 2.62 | 255.9              | 156                       | 22                    | 17                      | ESI(+)             |

**Table S4.** Summary results for mean concentration and frequency detection of pharmaceuticals at each site of Han River watershed.

| Sites | Mean<br>Concentration<br>( $\mu\text{g L}^{-1}$ ) | Frequency<br>detection<br>(%) |
|-------|---------------------------------------------------|-------------------------------|
| SR-1  | 0.0841                                            | 37.5                          |
| SR-2  | 0.0442                                            | 34.4                          |
| SR-3  | 0.0522                                            | 34.4                          |
| SR-4  | 0.0678                                            | 65.6                          |
| SR-5  | 0.0201                                            | 31.3                          |
| SR-6  | 0.0071                                            | 6.3                           |
| SR-7  | 0.0107                                            | 15.6                          |
| NR-1  | 0.0857                                            | 6.3                           |
| NR-2  | 0.0345                                            | 12.5                          |
| NR-3  | 0.0131                                            | 21.9                          |
| NR-4  | 0.0095                                            | 25.0                          |
| NR-5  | 0.0223                                            | 12.5                          |
| IHR-1 | 0.1591                                            | 75.0                          |
| IHR-2 | 0.0189                                            | 46.9                          |
| IHR-3 | 0.0632                                            | 3.1                           |
| IHR-4 | 0.0234                                            | 50.0                          |
| HR-1  | 0.1087                                            | 59.4                          |
| HR-2  | 0.1530                                            | 50.0                          |
| HR-3  | 0.0226                                            | 37.5                          |
| HR-4  | 0.2281                                            | 53.1                          |
| HR-5  | 0.1874                                            | 53.1                          |
| HR-6  | 0.0315                                            | 31.3                          |
| HR-7  | 0.1042                                            | 59.4                          |
| HR-8  | 0.0526                                            | 53.1                          |
